# Supplementary material for: Self-assembled pit arrays as templates for the integration of Au nanocrystals in oxide surfaces
Source: Royal Society of Chemistry journal article supplement (doi:10.1039/c2nr33181k), 2012-11-22
Supplement: c2nr33181k.pdf [file c2nr33181k.pdf]

Cite this: DOI: 10.1039/c0xx00000x

www.rsc.org/xxxxxx

ARTICLE TYPE

## **Supplementary information Self-assembled Pit Arrays as Templates for the Integration of Au Nano-crystals in Oxide Surfaces**

**Z. Konstantinović,<sup>a</sup> F. Sandiumenge,<sup>a</sup> J. Santiso,<sup>b</sup> Ll. Balcells<sup>a</sup> and B. Martínez<sup>a</sup>**

*Received (in XXX, XXX) Xth XXXXXXXXXX 200X, Accepted Xth XXXXXXXXXX 200X*

DOI: 10.1039/b000000x

### Long range order in one direction

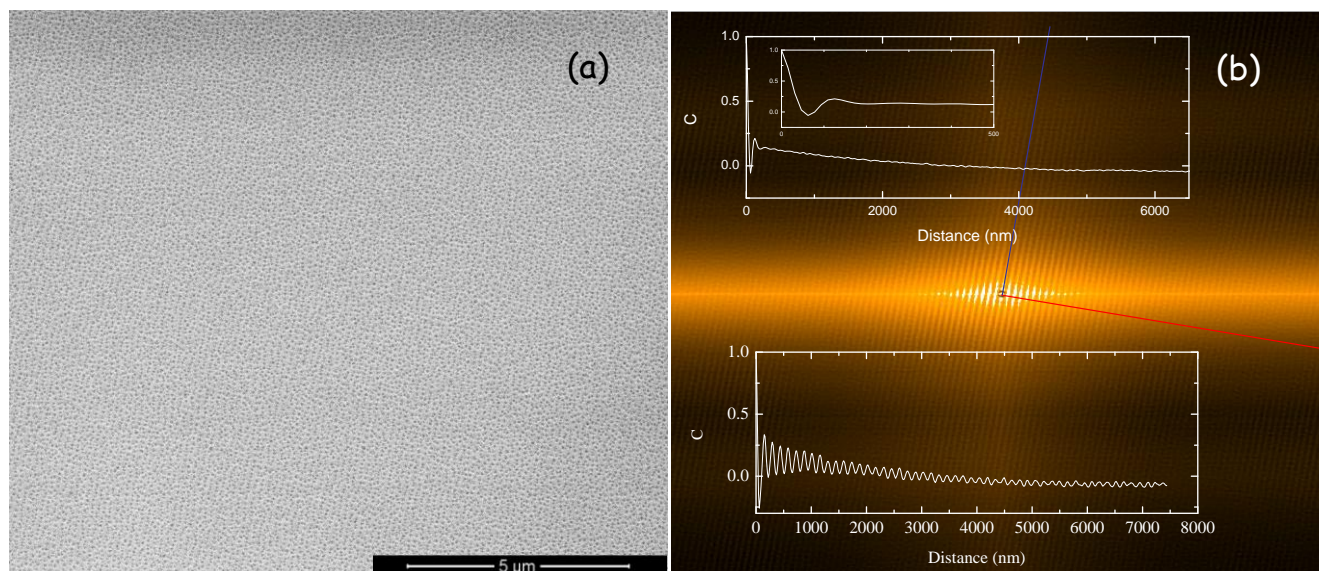

10 **Fig. S1** (a) Large area SEM image ( $1500 \times 1300 \text{ nm}^2$ ) where regular nanopit arrays are visible in the whole surface and (b) corresponding autocorrelation functions  $C$  with profiles along (blue line) and normal (red line) to nanopit array.
